# Supplementary material
Source: publisher figshare collection journal article supplement (https://acs.figshare.com/ndownloader/files/14225612)
Supplement: Supplementary file 1 [file 14225612]

# Supporting Information

## Bifacial Raman Enhancement on Monolayer Two-dimensional Materials

Na Zhang<sup>†</sup>, Jingjing Lin<sup>†</sup>, Wei Hu<sup>†,‡</sup>, Shuqing Zhang<sup>†</sup>, Liangbo Liang<sup>‡</sup>, Rui Wang<sup>//</sup>, Xue Luo<sup>†</sup>, Yi Luo<sup>†</sup>, Xiaohui Qiu<sup>//</sup>, Jin Zhang<sup>†</sup>, Lianming Tong<sup>\*,†</sup>

<sup>†</sup> Center for Nanochemistry, Beijing Science and Engineering Center for Nanocarbons, Beijing National Laboratory for Molecular Sciences, College of Chemistry and Molecular Engineering, Peking University, Beijing, 100871, P. R. China

<sup>‡</sup> Hefei National Laboratory for Physical Science at the Microscale and Synergetic Innovation Center of Quantum Information & Quantum Physics, University of Science and Technology of China, Hefei, 230026 Anhui, P. R. China

<sup>‡</sup> Center for Nanophase Materials Sciences, Oak Ridge National Laboratory, Oak Ridge, Tennessee 37831, USA

<sup>//</sup> National Center for Nanoscience and Technology, Chinese Academy of Sciences, Beijing 100190, P. R. China

<sup>\*</sup> Current Address: School of Chemistry and Pharmaceutical Engineering, Qilu University of Technology (Shandong Academy of Sciences), Jinan 250353, P. R. China.

\*E-mail: tonglm@pku.edu.cn

Table S1. Enhancement Factors of Different Raman Modes of CuPc on Different Substrates

| $\omega_{exp}(cm^{-1})$ | $\omega_{the}(cm^{-1})$ | EF <sub>G,SL</sub> | EF <sub>G,DL</sub> | EF <sub>BN,SL</sub> | EF <sub>BN,DL</sub> | Ratio <sub>G</sub> | Ratio <sub>BN</sub> | Mode assignment                                                                |
|-------------------------|-------------------------|--------------------|--------------------|---------------------|---------------------|--------------------|---------------------|--------------------------------------------------------------------------------|
| 682                     | 675                     | 3.1                | 5.1                | 5.2                 | 8.9                 | 1.6                | 1.7                 | Macrocycle breathing, most contributed by the change of C-N and C-C bond angle |
| 749                     | 748                     | 7.6                | 13.5               | 9.4                 | 16.0                | 1.8                | 1.7                 | Pyrrole out of plane bending                                                   |
| 1109                    | 1115                    | 3.4                | 6.4                | 4.3                 | 7.1                 | 1.9                | 1.7                 | C-H and Cu-N bending                                                           |
| 1144                    | 1155                    | 11.7               | 26.5               | 30.5                | 40.7                | 2.3                | 1.3                 | C-H deformation and outer ring breathing                                       |
| 1306                    | 1300                    | 4.5                | 9.5                | 6.0                 | 8.2                 | 2.1                | 1.3                 | Cu-N asymmetric stretching and C-N stretching                                  |
| 1341                    | 1334                    | 10.7               | 22.5               | 30.8                | 38.9                | 2.1                | 1.3                 | Cu-N symmetric stretching and C-N stretching                                   |
| 1452                    | 1462                    | 8.0                | 16.3               | 8.6                 | 13.8                | 2.0                | 1.6                 | benzene ring C-C stretching                                                    |
| 1531                    | 1548                    | 26.6               | 47.9               | 28.5                | 39.5                | 1.8                | 1.4                 | C=N and C=C stretching                                                         |

$\omega_{exp}$  and  $\omega_{the}$  are the experimental and calculated Raman shift of CuPc molecule, respectively. EF<sub>G,SL</sub> and EF<sub>BN,SL</sub> are the enhancement factors of vibration modes of single-layer (SL) CuPc molecules on graphene and *h*-BN, respectively. EF<sub>G,DL</sub> and EF<sub>BN,DL</sub> are the enhancement factors of vibration modes of double-layer (DL) CuPc molecules on graphene and *h*-BN, respectively. Ratio<sub>G</sub> and Ratio<sub>BN</sub> are the ratios of Raman signal of double-layer of molecules versus single-layer ones, respectively. The vibrational modes are assigned by Gaussian 03 package.

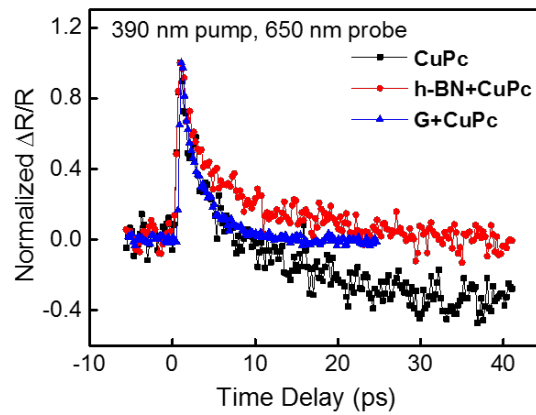

Figure S1. Measured reflectivity for three samples of CuPc on blank 300 nm SiO<sub>2</sub>/Si (black line), *h*-BN (red line) and graphene (blue line).

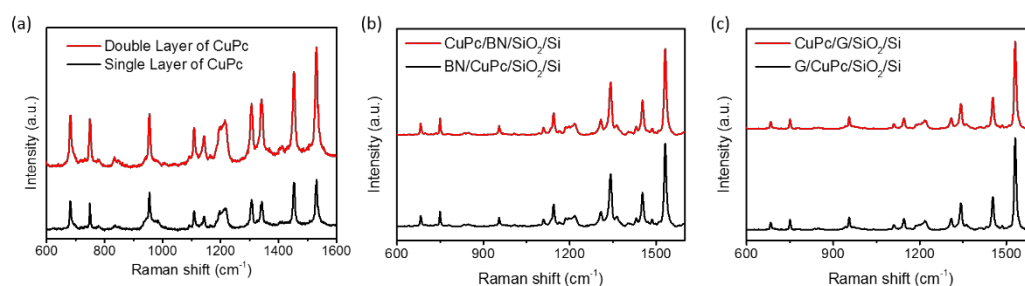

Figure S2. Raman spectra of double-layer CuPc molecules and single-layer CuPc molecules on blank SiO<sub>2</sub>/Si (a). Comparison of Raman spectra of CuPc molecules on and underneath *h*-BN (b) and graphene (c).

The intensity of double-layer CuPc molecules on SiO<sub>2</sub>/Si was twice that of single-layer CuPc, as shown in Figure S2a. Figure S2b and S2c show that the intensities were almost the same when the molecules were under and on the top of the 2D material. Only a difference of less than 4% was observed. The relative intensities of the Raman peaks were also the same for molecules on the top and under 2D materials.

To make sure that the amount of deposited molecules is equal on both blank SiO<sub>2</sub>/Si region and 2D materials, XPS (X-ray photoelectron spectroscopy) measurements were carried out, and the full XPS spectra were as shown in Figure S3a. The intensities of Cu 2p<sub>3/2</sub> peak at around 950 eV on SiO<sub>2</sub>/Si and graphene regions were almost the same (Figure S3b), while the intensity of C 1s peak at around 285 eV on SiO<sub>2</sub>/Si region was nearly half of that on graphene region for the contribution of the carbon from graphene (Figure S3c). The results indicated that the 2D materials would not change the amount of deposited CuPc molecules.

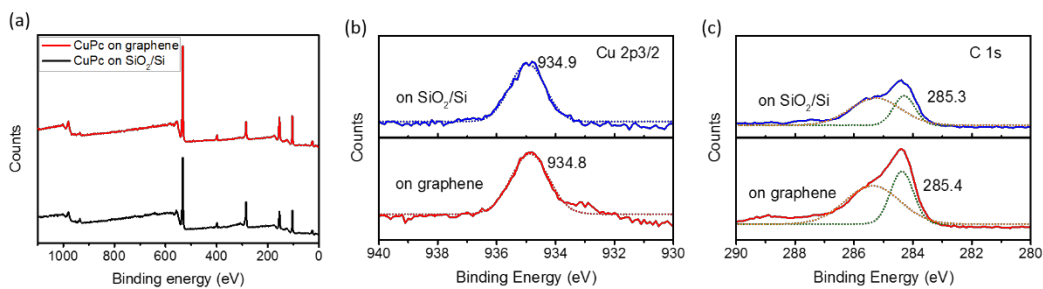

Figure S3. The XPS scanning spectra of CuPc on blank SiO<sub>2</sub>/Si (black) and graphene (red). Well-resolved XPS spectra of Cu 2p<sub>3/2</sub> (b) and C 1s (c) of CuPc molecules on blank SiO<sub>2</sub>/Si (blue) and graphene substrate (red).

Table S2 Calculated Total Energies of CuPc/BN under different adsorption configurations(eV)

| Rotation<br>Translation | 0°       | 15°      | 30°      | 45°      | 60°      |
|-------------------------|----------|----------|----------|----------|----------|
| Cu on Nitrogen          | -2946.60 | -2946.50 | -2946.61 | -2946.50 | -2946.60 |
| Cu on Boron             | -2946.51 | -2946.60 | -2946.53 | -2946.60 | -2946.52 |

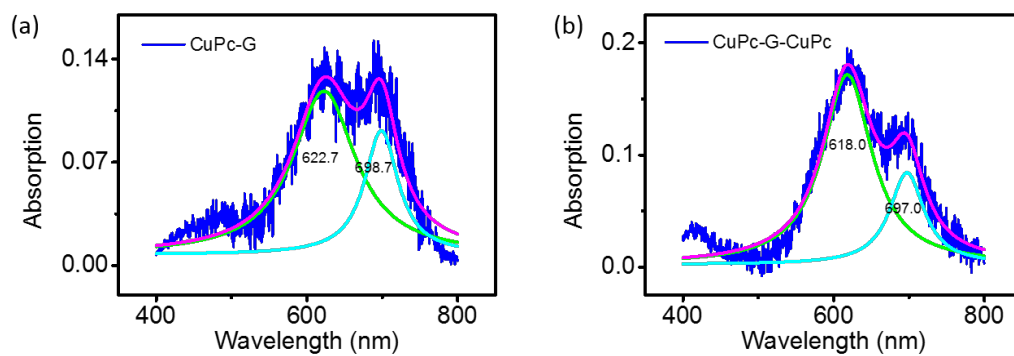

Figure S4. Comparison of the absorption spectra of CuPc molecules on one surface (a) and on both surfaces of a monolayer graphene flake (b).

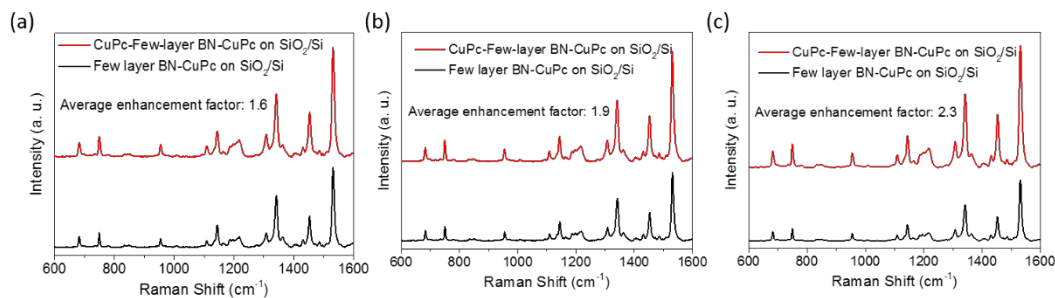

Figure S5. Raman spectra of double-layer CuPc molecules and single-layer CuPc molecules enhanced by *h*-BN of different thickness: 2.7 nm (a), 4.6 nm (b) and 6.4 nm (c), respectively.

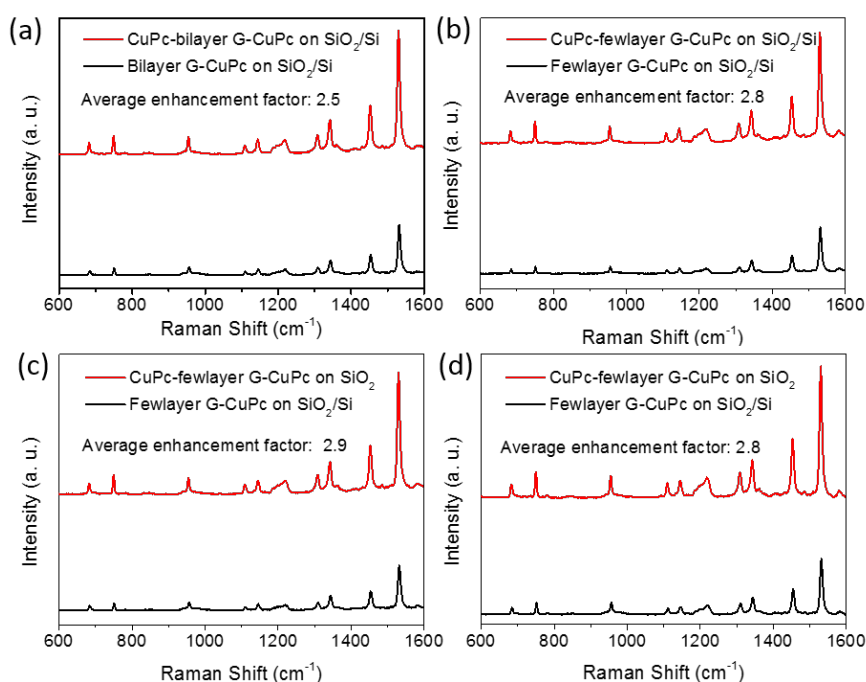

Figure S6. The Raman spectra of double-layer CuPc molecules and single-layer CuPc molecules enhanced by graphene of different thickness: 1.7 nm (a), 2.7 nm (b), 3.4 nm (c) and 5.5 nm (d), respectively.

The surface coverage of deposited CuPc molecules can be estimated as follows. During deposition, the thickness is monitored by the frequency change of the quartz monitor crystals. Since CuPc was not a material in the program for monitoring the thickness, carbon (graphite,  $\rho_M = 2.25 \text{ g/cm}^3$ ) was chosen instead. The defined thickness of deposition in our experiment was 3 Å. The increased mass of the deposited material is:

$$\Delta m = A * \rho_g * \Delta d_g = M_{CuPc} * n_{CuPc} / N_A$$

where  $A$  is the deposition area of the sample,  $\rho_g$  is the density of the graphite film,  $\Delta d_g$  is the thickness change of graphite,  $M_{CuPc}$  is the relative molar mass of CuPc,  $n_{CuPc}$  is the number of CuPc molecules, and  $N_A$  is Avogadro's constant. Then the number of deposited CuPc molecules is:

$$n_{CuPc} = \frac{A * \rho_g * \Delta d_g * N_A}{M_{CuPc}}$$

and the area of CuPc ( $A_{CuPc}$ ) of the same mass as graphite can be calculated by:

$$A_{CuPc} = A_{CuPc\_single} * n_{CuPc}$$

where  $A_{CuPc\_single}$  is the area of a single CuPc molecule deposited on silica.

The degree of surface coverage (sc) of CuPc on the sample can be calculated by:

$$sc = \frac{A_{CuPc}}{A} = \frac{A_{CuPc\_single} * n_{CuPc}}{A} = \frac{A_{CuPc\_single} * \rho_g * \Delta d_g * N_A}{M_{CuPc}}$$

where the value of  $A_{CuPc\_single}$  is adopted as that on  $TiO_2(110)$  surface, which is around  $2 \text{ nm}^2$  [S1].  $M_{CuPc} = 576.08 \text{ g} \cdot \text{mol}^{-1}$ ,  $N_A = 6.02 \times 10^{23} \text{ mol}^{-1}$ . Then

$$sc = \frac{2 \text{ nm}^2 * 2.25 \text{ g} \cdot \text{cm}^{-3} * 3 \text{ \AA} * 6.02 * 10^{23} \text{ mol}^{-1}}{576.08 \text{ g} \cdot \text{mol}^{-1}} \approx 1.4$$

So the surface coverage is estimated to be  $\sim 1.4$  in an ideal situation with all molecules in monomeric state. Assumed that half of the molecules are in aggregated state of tetramer in  $\pi$ - $\pi$  stacking and the other half in monomeric state, then the surface coverage is 0.88. In this regard, the density of molecules is sufficient for the overlapping in 2D material's plane on the two surface.

References:

S1. Wang, Y.\*; Wu, K.\*, Kröger, J.; Berndt, R. Structures of Phthalocyanine Molecules on Surfaces Studied by STM. *AIP Adv.*, **2012**, 2, 041402.
